# Supplementary material for: Inhibition of Dopamine Activity and Response of Rhipicephalus microplus Challenged with Metarhizium anisopliae
Source: MDPI journal article supplement (doi:10.3390/jof8121312), 2022-12-17
Supplement: s1 [file s1]

**Table S1.** Average and standard error of initial female weight, egg mass weight, egg production index (EPI), nutritional index (NI), reproductive efficiency (RE), and tick control percent of *Rhipicephalus microplus* females inoculated with the antagonist SCH 23390 (1 nM or 1  $\mu$ M) and *Metarhizium anisopliae* ( $1 \times 10^7$  conidia/mL).

|                   | Initial female weight (mg) | Egg mass weight (mg) | EPI (%)          | NI (%)           | RE (%)           | Tick Control (%) |
|-------------------|----------------------------|----------------------|------------------|------------------|------------------|------------------|
| <b>Controle</b>   | 199.4 a $\pm$ 0.01         | 99.2 a $\pm$ 0.008   | 49.7 a $\pm$ 1.5 | 64.4 a $\pm$ 1.9 | 45.7 a $\pm$ 1.9 | -                |
| <b>PBS</b>        | 198.0 a $\pm$ 0.01         | 88.2 a $\pm$ 0.008   | 45.1 a $\pm$ 2.8 | 59.4 a $\pm$ 3.4 | 38.1 a $\pm$ 3.4 | -                |
| <b>SCH A</b>      | 197.4 a $\pm$ 0.01         | 89.1 a $\pm$ 0.007   | 45.3 a $\pm$ 2.4 | 64.8 a $\pm$ 3.6 | 29.9 a $\pm$ 3.5 | 32.4             |
| <b>SCH B</b>      | 197.5 a $\pm$ 0.01         | 80.6 a $\pm$ 0.008   | 40.7 a $\pm$ 3.1 | 60.7 a $\pm$ 2.7 | 29.5 a $\pm$ 3.1 | 25.2             |
| <b>MA</b>         | 198.3 a $\pm$ 0.01         | 40.1 b $\pm$ 0.007   | 25.1 b $\pm$ 5.0 | 24.8 b $\pm$ 3.7 | 7.7 b $\pm$ 2.7  | 78.2             |
| <b>SCH A + MA</b> | 191.7 a $\pm$ 0.01         | 19.1 b $\pm$ 0.005   | 9.6 c $\pm$ 2.7  | 25.3 b $\pm$ 5.9 | 6.6 b $\pm$ 2.5  | 79.2             |
| <b>SCH B + MA</b> | 200.3 a $\pm$ 0.01         | 17.5 b $\pm$ 0.005   | 8.8 c $\pm$ 2.7  | 23.8 b $\pm$ 5.6 | 4.0 b $\pm$ 1.9  | 90.5             |

Means followed by the same letter, in the same column, do not differ significantly from each other ( $P \geq 0.05$ ). **CTR**: untreated ticks; **PBS**: ticks inoculated with phosphate buffer solution; **SCH A**: ticks inoculated with the antagonist at 1 nM; **SCH B**: ticks inoculated with antagonist at 1  $\mu$ M; **MA**: ticks inoculated with *M. anisopliae*; **SCH A + MA**: ticks inoculated with the lowest concentration of the antagonist and then the fungus; **SCH B + MA**: ticks inoculated with the highest concentration of the antagonist and then the fungus.
